# Supplementary material for: Case report: MicroRNA-10b as a therapeutic target in feline metastatic mammary carcinoma and its implications for human clinical trials
Source: PubMed Central journal article supplement (PMC9643803; doi:10.3389/fonc.2022.959630), 2022-10-26
Supplement: DataSheet_1.pdf [file DataSheet_1.pdf]

## Supplementary Material

### 1 Supplementary Figures and Tables

#### 1.1 Supplementary Figures

Figure

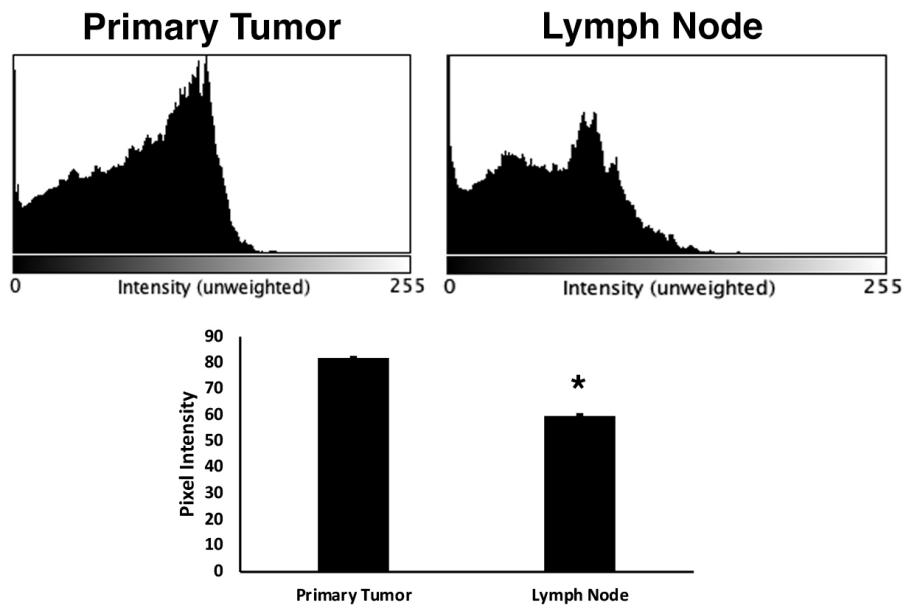

**Supplementary Figure 1.** Histogram analysis (left) and quantitation (right) of pixel-by-pixel signal intensity from the primary tumor and metastatic lymph nodes in Fig. 2B showing a significant difference in HOXD10 staining ( $p < 0.05$ ).

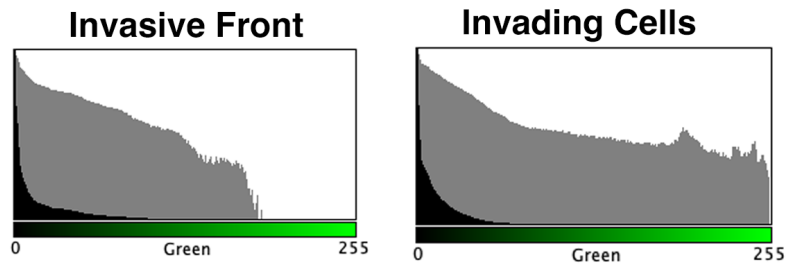

**Supplementary Figure 2.** Histogram analysis (log scale) of pixel-by-pixel signal intensity corresponding to cells stained for miRNA-10b in Fig. 2C, showing positivity for miRNA-10b expression in both cell populations.

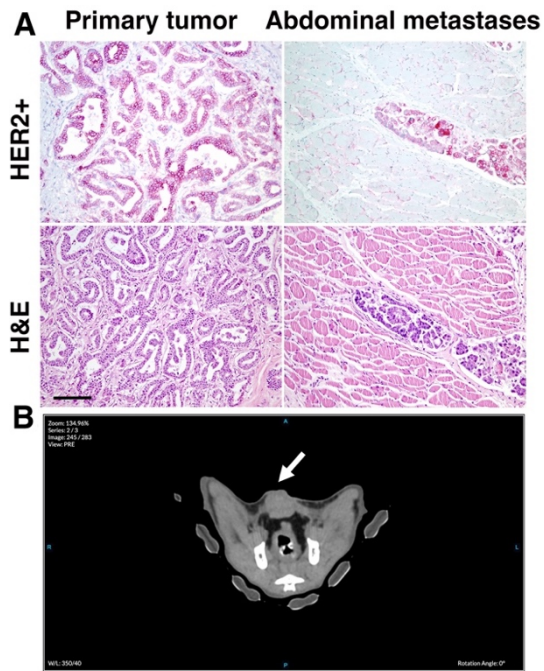

**Supplementary Figure 3.** A) Case 0 patient's primary (left) and metastatic (right) tumors stained for HER2+ (top row) and H&E (bottom row). Scale bar=200 $\mu$ m. B) CT imaging showing metastatic tumors in the abdominal area of the patient with FMC (arrow).

### Cy5.5 Pixel Intensity

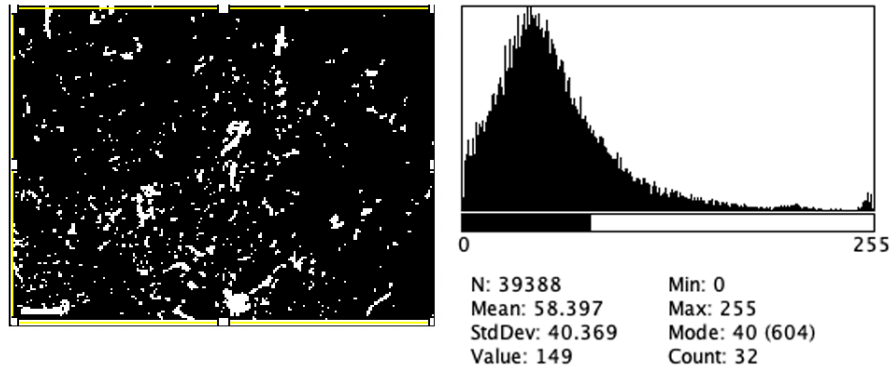

**Supplementary Figure 4.** Processed image (left) and corresponding histogram (right) of Cy5.5 fluorescence intensity in biopsy samples (Fig. 3D) obtained 24 hours after dosing, indicating the presence of the therapeutic in the tissue.

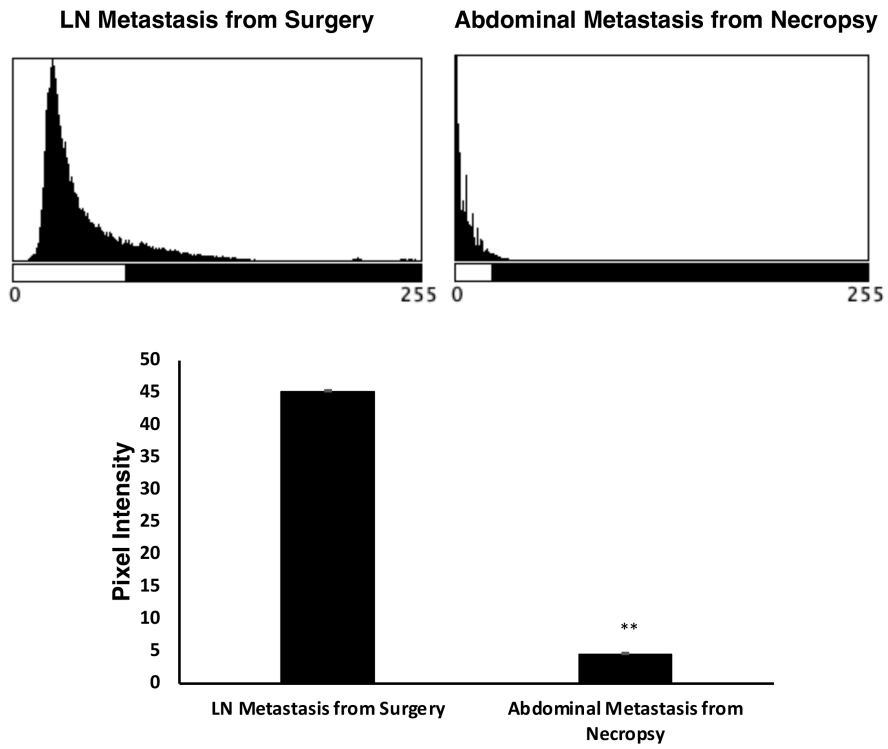

**Supplementary Figure 5.** Histogram analysis (top) and quantitation (bottom) of pixel-by-pixel signal intensity (Fig. 4B) in metastatic tissue obtained during original surgery and at necropsy after dosing showing significant difference in HOXD10 expression ( $p < 0.01$ ).

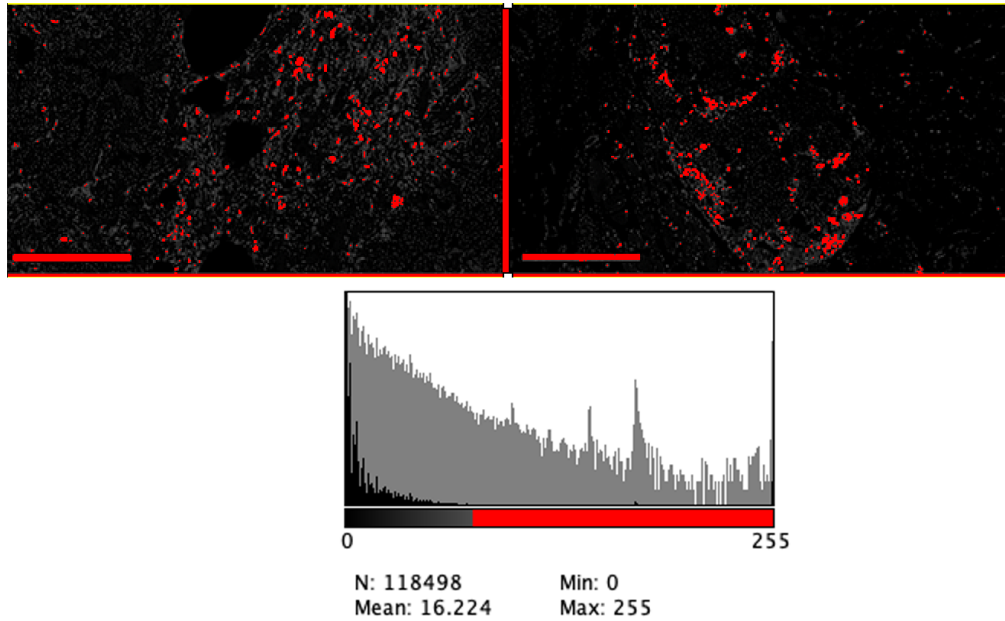

**Supplementary Figure 6.** Processed color-coded image (top) and corresponding histogram (log scale, bottom) of Cy5.5 fluorescence intensity in necropsy samples from lung (left) and abdominal (right) metastasis (Fig. 4C) indicating the presence of the therapeutic at three months after dosing.

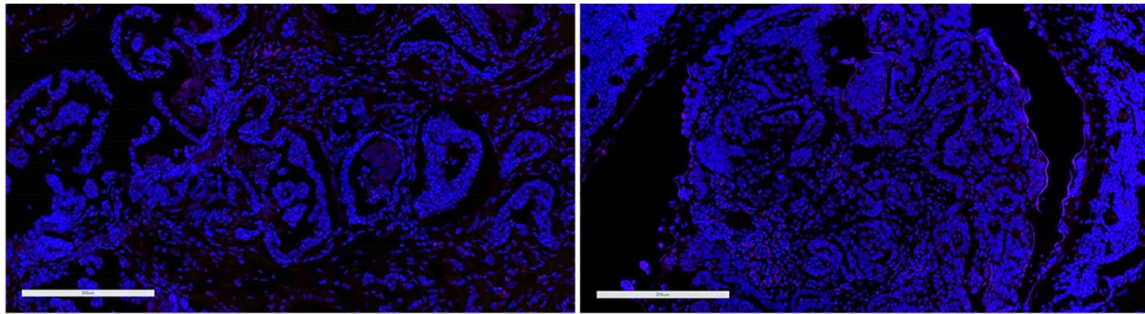

**Supplementary Figure 7.** Tissues from the primary tumor (left) and metastatic lymph nodes (right) obtained during the original surgery did not show Cy5.5 signal from the therapeutic. DAPI staining of nuclei (blue). Scale bar = 200 $\mu$ m.

## 1.2. Supplementary Tables



Table 1. Complete blood count.

|                        | 1 <sup>st</sup> dose (6/27) |         |        |        |        | 2 <sup>d</sup> dose (8/17) |        |        |        |             | Euthanasia (11/16) |  |  |  |  |
|------------------------|-----------------------------|---------|--------|--------|--------|----------------------------|--------|--------|--------|-------------|--------------------|--|--|--|--|
|                        | 6/20                        | 6/27    | 6/28   | 7/13   | 7/19   | 8/3                        | 9/28   | 10/9/  | 10/11  | Ref Range   | Units              |  |  |  |  |
| <b>CBC</b>             |                             |         |        |        |        |                            |        |        |        |             |                    |  |  |  |  |
| <i>RBC</i>             | 6.7 L                       | 7.0 L   | 4.3 L  | 6.8 L  | 6.4 L  | 6.6 L                      | 6.8 L  | 6.5 L  | 4.9 L  | [7.9-11.6]  | x10.e6/uL          |  |  |  |  |
| <i>Hgb</i>             | 10.3 L                      | 10.6 L  | 6.5 L  | 10.6 L | 9.9 L  | 10.7 L                     | 10.2 L | 9.9 L  | 7.5 L  | [11.9-17.5] | g/dL               |  |  |  |  |
| <i>Hct</i>             | 32 L                        | 34      | 20 L   | 33 L   | 31 L   | 31 L                       | 32 L   | 31 L   | 23 L   | [34-51]     | %                  |  |  |  |  |
| <i>MCV</i>             | 49                          | 48      | 47     | 48     | 48     | 47                         | 48     | 48     | 47     | [38-52]     | fL                 |  |  |  |  |
| <i>MCH</i>             | 15                          | 15      | 15     | 16     | 16     | 16                         | 15     | 15     | 15     | [13-17]     | pg                 |  |  |  |  |
| <i>MCHC</i>            | 32 L                        | 31 L    | 32 L   | 32 L   | 32 L   | 34                         | 32 L   | 32 L   | 32 L   | [33-37]     | g/dL               |  |  |  |  |
| <i>CHCM</i>            | 30 L                        | 30 L    | 30 L   | 31 L   | 32     | 32                         | 32     | 31 L   | 32     | [32-35]     | g/dL               |  |  |  |  |
| <i>RDW</i>             | 16                          | 17 H    | 16     | 17 H   | 18 H#  | 16                         | 17 H   | 17 H   | 17 H   | [14-16]     | %                  |  |  |  |  |
| <i>Platelet</i>        | 249                         | 215     | 174 L  | 389    | 427    | 243                        | 252    | 235    | 263    | [179-569]   | x10.e3/uL          |  |  |  |  |
| <i>MPV</i>             | 17.5                        | 18.9 H  | 17.8   | 21.1 H | 19.7 H | 17.8                       | 18.2 H | 18.7 H | 19.5 H | [9.8-18.1]  | fL                 |  |  |  |  |
| <i>WBC</i>             | 29.5 H                      | 16.8 H# | 16.8 H | 25.2 H | 18.8 H | 30.3 H                     | 35.6 H | 20.8 H | 24.4 H | [4.4-15.6]  | x10.e3/uL          |  |  |  |  |
| <i>Neut #</i>          | 25.1 H                      | 14.6 H  | 14.3 H | 24.7 H | 17.5 H | 27.3 H                     | 34.0 H | 19.9 H | 22.6 H | [2.3-11.8]  | x10.e3/uL          |  |  |  |  |
| <i>Lymphnocyte #</i>   | 0.6                         | 1       | 1      | 0.5    | 0.8    | 0.9                        | 0.7    | 0.6 L  | 1      | [0.7-6.3]   | x10.e3/uL          |  |  |  |  |
| <i>Monocyte #</i>      | 0.3                         | 0.2     | 0.2    | 0      | 0      | 0                          | 0.5 H  | 0.2    | 0.2    | [0.1-0.4]   | x10.e3/uL          |  |  |  |  |
| <i>Eosinophil #</i>    | 3.2 H                       | 0.8     | 1.2    | 0      | 0.6    | 1.8 H                      | 0.4    | 0.2    | 0.5    | [0.2-1.3]   | x10.e3/uL          |  |  |  |  |
| <i>Neut Pet</i>        | 85                          | 87      | 85.3   | 98     | 93     | 90                         | 95.5   | 95.7   | 92.8   |             | %                  |  |  |  |  |
| <i>Lymphnocyte Pet</i> | 2                           | 6       | 5.7    | 2      | 4      | 3                          | 2      | 2.7    | 4.1    |             | %                  |  |  |  |  |
| <i>Monocyte Pet</i>    | 1                           | 1       | 1.5    | 0      | 0      | 0                          | 1.3    | 0.8    | 0.9    |             | %                  |  |  |  |  |
| <i>Eosinophil Pet</i>  | 11                          | 5       | 7.4    | 0      | 3      | 6                          | 1.1    | 0.7    | 2.1    |             | %                  |  |  |  |  |

# Manual count; H- high; L-low.

Table 2. Blood chemistry. 1<sup>st</sup> dose → 2d dose (8/17) → Euthanasia

| Clinical Chemistry | 6/20  | 6/27  | 6/28  | 7/13  | 7/19  | 8/3   | 8/29  | 9/21  | 9/10  | 10/11 | Ref Range   | Units  |
|--------------------|-------|-------|-------|-------|-------|-------|-------|-------|-------|-------|-------------|--------|
| Urea Nitrogen      | 29    | 28    | 24    | 23    | 41 H  | 36    | 45 H  | 37 H  | 42 H  | 34    | [19-36]     | mg/dL  |
| Creatinine         | 1.2   | 1.2   | 1     | 1.1   | 1.6   | 1.5   | 1.6   | 1.5   | 1.6   | 1.2   | [1.0-2.3]   | mg/dL  |
| Sodium             | 154   | 155   | 151   | 150   | 152   | 152   | 151   | 155   | 150   | 155   | [145-155]   | mmol/L |
| Potassium          | 4.4   | 4.2   | 3.4 L | 3.9   | 4.7   | 4     | 4.6   | 3.9   | 4.3   | 3.7 L | [3.8-5.4]   | mmol/L |
| Chloride           | 124 H | 123   | 121   | 121   | 119   | 119   | 118   | 121   | 120   | 123   | [110-123]   | mmol/L |
| TCO2               | 18    | 16    | 22    | 16    | 18    | 21    | 18    | 16    | 16    | 19    | [13-22]     | mmol/L |
| Na/K Ratio         | 35    | 37    | 44 H  | 38    | 32    | 38    | 33    | 40    | 35    | 42 H  | [28-40]     |        |
| Anion Gap          | 16    | 20    | 11 L  | 17    | 20    | 16    | 20    | 22    | 18    | 17    | [15-28]     | mmol/L |
| Osmolarity Calc    | 326 H | 325 H | 314   | 315   | 323   | 322   | 322   | 328 H | 321   | 326 H | [302-323]   | mOs/L  |
| Calcium            | 8.8 L | 9.2   | 8.5 L | 8.5 L | 9.1   | 9.1   | 9.2   | 9.4   | 9.1   | 9.1   | [9.1-10.7]  | mg/dL  |
| Phosphorus         | 3.6   | 3.6   | 5.7   | 3     | 5.6   | 3.3   | 5     | 4.3   | 5.3   | 4.4   | [2.7-5.7]   | mg/dL  |
| Magnesium          | 1.9   | 2     | 1.9   | 1.7 L | 2.1   | 1.9   | 2.2   | 2     | 2     | 1.6 L | [1.8-2.5]   | mg/dL  |
| Iron               | 62    | 55    | 129   | 34 L  | 83    | 90    | 89    | 65    | 103   | 226 H | [45-157]    | ug/dL  |
| Total Protein      | 6.2 L | 6.8   | 5.5 L | 7     | 7     | 6.7   | 6.6   | 6.8   | 6.5   | 6.0 L | [6.5-7.8]   | g/dL   |
| Albumin            | 2.4 L | 2.6 L | 2.1 L | 2.5 L | 2.3 L | 2.5 L | 2.5 L | 2.6 L | 2.6 L | 2.3 L | [3.0-3.9]   | g/dL   |
| Globulin Calc      | 3.8   | 4.2   | 3.4   | 4.5   | 4.7   | 4.2   | 4.1   | 4.2   | 3.9   | 3.7   | [2.8-4.7]   | g/dL   |
| Glucose            | 129   | 90    | 56 L  | 115   | 84    | 100   | 69 L  | 86    | 103   | 68 L  | [78-143]    | mg/dL  |
| Amylase            | 951   | 899   | 767   | 844   | 1002  | 993   | 963   | 983   | 1056  | 897   | [476-1,779] | U/L    |
| Total Bili         | 0.1   | 0.1   | 0.1   | 0.1   | 0.1   | 0.1   | 0.1   | 0.1   | 0.1   | 0.1   | [0.1-0.3]   | mg/dL  |
| Direct Bili        | 0     | 0     | 0     | 0     | 0     | 0     | 0     | 0     | 0     | 0     | [0.0-0.1]   | mg/dL  |
| Indirect Bili      | 0.1   | 0.1   | 0.1   | 0.1   | 0.1   | 0.1   | 0.1   | 0.1   | 0.1   | 0.1   | [0.1-0.3]   | mg/dL  |
| ALP                | 30    | 40    | 33    | 30    | 26    | 30    | 32    | 27    | 34    | 32    | [13-48]     | U/L    |
| ALT                | 40    | 43    | 39    | 33    | 37    | 38    | 36    | 26    | 30    | 33    | [25-76]     | U/L    |
| AST                | 39 H  | 36    | 41 H  | 28    | 33    | 39 H  | 43 H  | 44 H  | 37 H  | 41 H  | [14-36]     | U/L    |
| CK                 | 231   | 267   | 532 H | 81    | 99    | 180   | 167   | 188   | 135   | 154   | [46-490]    | U/L    |
| Chol               | 155   | 172   | 124   | 144   | 190   | 185   | 186   | 234   | 186   | 158   | [72-248]    | mg/dL  |

H- high; L-low
